# Supplementary material for: Effects of Psychotropic Medication on Somatic Sterol Biosynthesis of Adult Mice
Source: MDPI journal article supplement (doi:10.3390/biom12101535), 2022-10-21
Supplement: s1 [file s1]

# Supplementary Material

## HepG2 cells

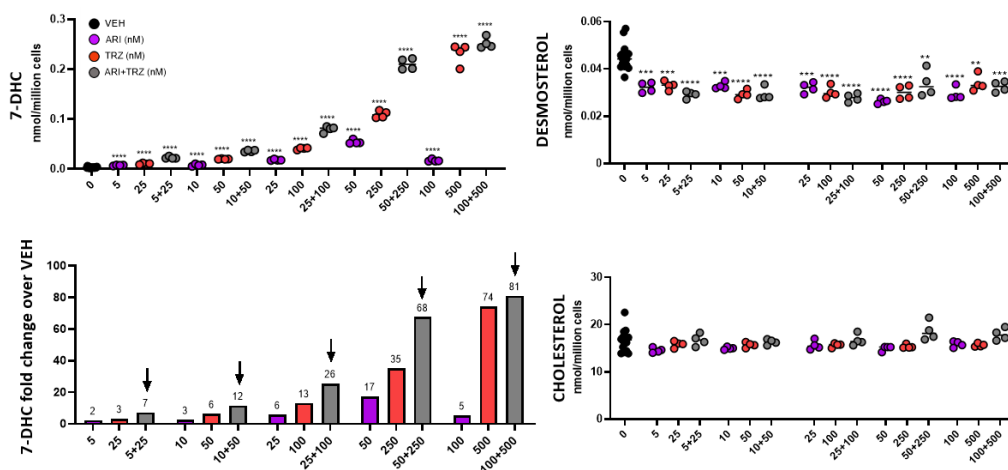

**Figure S1.** Dose-dependent effects ARI, TRZ and ARI + TRZ on sterol levels in HepG2 cells. HepG2 cells were cultured for 48 h, and treated with five different concentrations of ARI, TRZ or ARI + TRZ. Significance is denoted with black asterisks, \*\* $p < 0.01$ , \*\*\* $p < 0.001$ , \*\*\*\* $p < 0.0001$ . Note that ARI and TRZ polypharmacy treatment elevated 7-DHC levels in a synergistic fashion up to the highest concentrations used (black arrows). All three treatments (ARI, TRZ and ARI + TRZ) resulted in a significant decrease of DES in comparison to vehicle-treated cells.

## Neuro2a cells

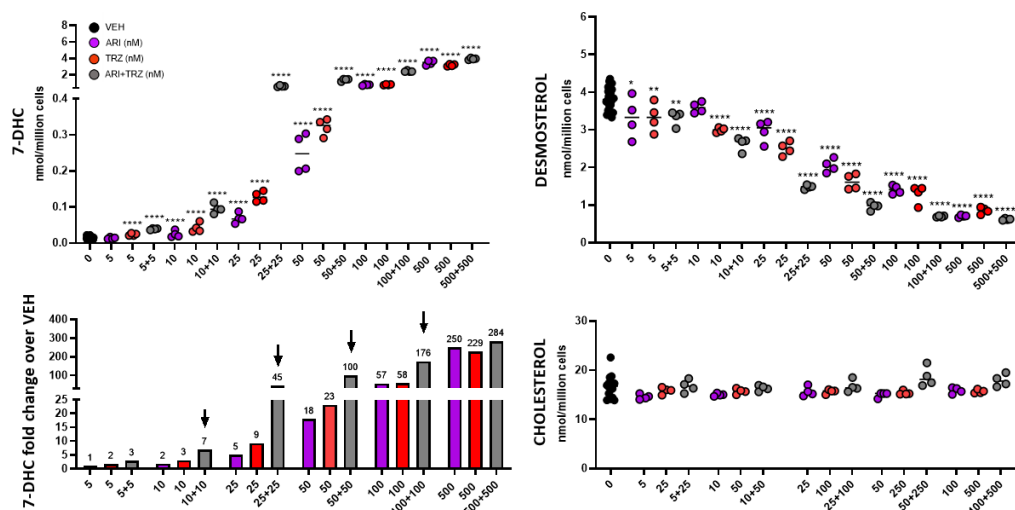

**Figure S2.** Dose-dependent effects ARI, TRZ and ARI + TRZ on sterol levels in Neuro2a cells. Neuro2a cells were cultured for 48h, and treated with six different concentrations of ARI, TRZ or ARI + TRZ. Significance is denoted with black asterisks, \* $p < 0.05$ , \*\* $p < 0.01$ , \*\*\* $p < 0.0001$ . Note that ARI and TRZ polypharmacy treatment elevated 7-DHC levels in a synergistic fashion in the mid-concentration range (black arrows). All three treatments (ARI, TRZ and ARI + TRZ) resulted in a significant decrease of DES in comparison to vehicle-treated cells.

## Human fibroblasts

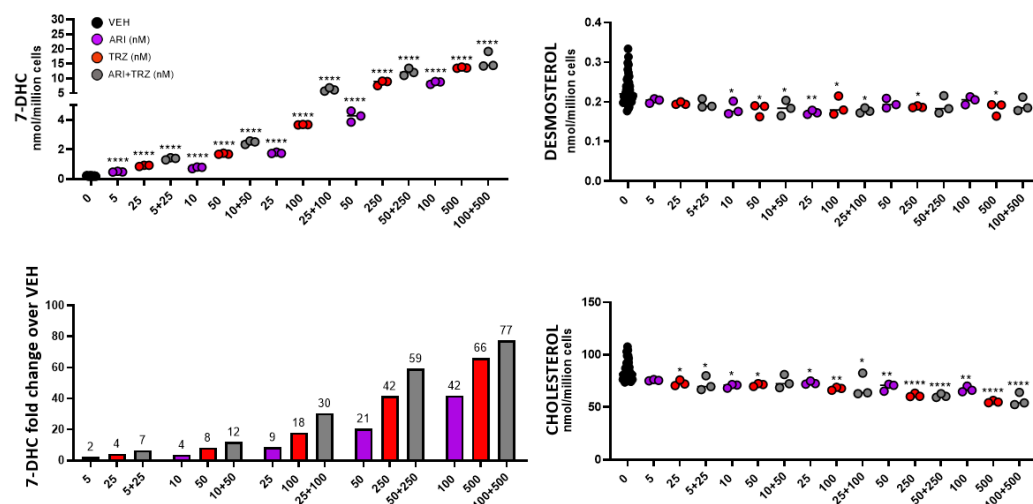

**Figure S3.** Dose-dependent effects ARI, TRZ and ARI + TRZ on sterol levels in human dermal fibroblasts. Human fibroblasts were cultured for 7 days, and treated with five different concentrations of ARI, TRZ or ARI+TRZ. Significance is denoted with black asterisks, \* $p < 0.05$ , \*\* $p < 0.01$ , \*\*\*\* $p < 0.0001$ . Note that ARI and TRZ polypharmacy treatment elevated 7-DHC levels in a summative fashion across all concentrations. The treatments (ARI, TRZ and ARI + TRZ) resulted in a small decrease in DES and CHOL levels in comparison to vehicle-treated cells.

## 7-DHC/CHOLESTEROL RATIO

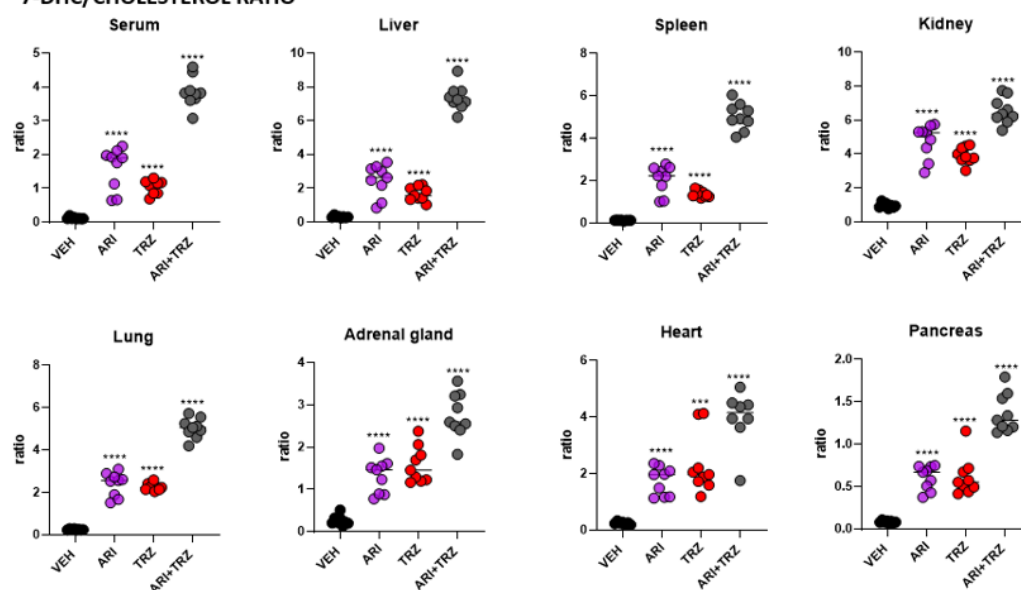

**Figure S4.** 7-DHC/CHOL ratio across serum and peripheral organs of TRZ, ARI and TRZ + ARI treated mice. Note the strong significant increase in 7-DHC/CHOL ratio in all three experimental groups, with the largest effect observed with ARI + TRZ treatment. Significance is denoted with black asterisks, \*\*\* $p < 0.001$ , \*\*\*\* $p < 0.0001$ .

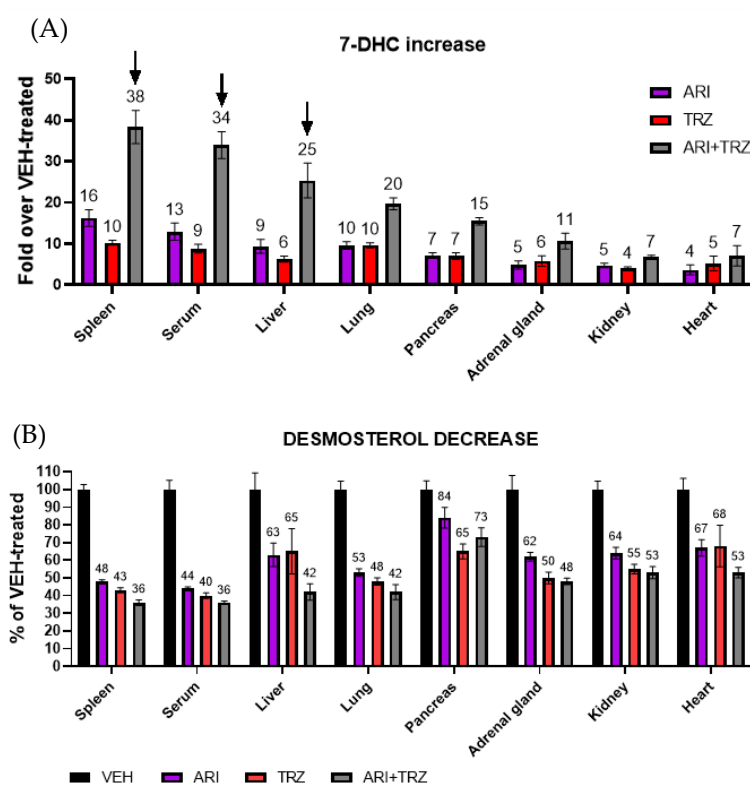

**Figure S5.** 7-DHC and DES changes across the mice serum and organs as a result of ARI, TRZ and ARI+TRZ treatment. **(A)** Serum and organs are represented on X axis, Y axis represents average fold change of 7-DHC increase over vehicle treated control samples. Numbers above columns represent mean groupwise fold change over vehicle treated control animals. **(B)** Y axis denotes percentage of DES level in comparison to vehicle-treated controls (100%). Numbers above columns represent the percentage of residual DES levels upon treatment. Error bars represents SEM in both panels.
